# Supplementary material for: Genetic Dissection of the Powdery Mildew Resistance in Wheat Breeding Line LS5082 Using BSR-Seq
Source: Research Square preprint supplement (doi:10.21203/rs.3.rs-663227/v1), 2021-07-09
Supplement: Supplementary file 1 [file f27c9890b0bbba8016b994b0.xlsx]

## Sheet: Sheet1
Table S5 Validation of PmLS5082-linked markers on 27 Chinese wheat cultivars/breeding lines in marker-assisted selection (MAS) breeding.
Genotypes	Xicsq405	WGGBH913	WGGBH612-5	YTU19-005	YTU19-007	YTU19-009	YTU19-011	YTU19-012	YTU19-014	YTU19-016	KASP19-26	KASP19-96
LS5082	+	+	+	+	+	+	+	+	+	+	+	+
Shimai 22	-	-	-	-	-	-	-	-	-	-	-	-
Shannong 29	-	-	-	-	-	-	-	-	-	-	-	-
Yannong 187	-	-	-	-	-	-	-	-	-	-	+	-
Shannong 1538	-	-	-	-	-	-	-	-	-	-	-	-
Zhoumai 27	-	-	-	-	-	+	-	-	-	-	+	-
Zhongyu 1311	-	-	-	-	-	+	-	-	-	-	-	-
Yan 1212	-	-	-	-	-	+	-	-	-	-	-	-
Jimai 229	-	-	-	-	-	-	-	-	-	-	-	-
Zhongyu 9398	-	-	-	-	-	-	-	-	+	-	-	-
Womai 8	-	-	-	-	-	+	-	-	-	-	-	-
Danmai 13	-	-	-	-	-	+	-	-	-	-	-	-
Daimai 2173	-	-	-	-	-	-	-	-	-	-	+	-
Wunong 6	-	-	-	-	-	-	-	-	-	-	-	-
Zhengmai 0856	-	-	-	-	-	-	-	-	-	-	-	+
Liangxing 619	-	-	-	-	-	+	-	-	-	-	+	-
Taimai 1918	-	-	-	-	-	-	-	-	-	-	+	-
Shimai 15	-	-	-	-	-	-	-	-	-	-	+	-
Qingmai 6	-	-	-	-	-	-	-	-	-	-	-	-
Huixianhong	-	-	-	-	-	-	-	-	-	-	+	-
Jinan 17	-	-	-	-	-	+	-	-	-	-	-	-
Yannong 21	-	-	-	-	-	+	-	-	-	-	-	-
Jimai 21	-	-	-	-	-	+	-	-	-	-	+	-
Shixin 633	-	-	-	-	-	-	-	-	-	-	-	-
Jimai 20	-	-	-	-	-	-	-	-	-	-	-	-
Tainong 1014	-	-	-	-	-	+	-	-	-	-	-	-
Luchen 185	-	-	-	-	-	+	-	-	-	-	-	-
Huaimai 226	-	-	-	-	-	+	-	-	-	-	+	-
Jimai 268	-	-	-	-	-	-	-	-	-	-	+	-
Xinong 979	-	-	-	-	-	-	-	-	-	-	-	-
Note: "-" represents that the markers can not amplify the polymorphic products that linked to PmLS5082 in relevant cultivar genetic backgrounds, and " +" represents the adverse result.
